# Supplementary material
Source: ML conference proceedings conference paper supplement (https://openaccess.thecvf.com/content/ICCV2023/html/Tang_Delicate_Textured_Mesh_ICCV_2023_paper.html)
Supplement: Supplementary file 2 [file Tang_Delicate_Textured_Mesh_ICCV_2023_supplemental.zip]

Archive with 3 entries (3 files):
- realtime_rendering_demo.mp4
- relighting_demo.mp4
- supp.pdf
